# Supplementary material for: R-flurbiprofen attenuates experimental autoimmune encephalomyelitis in mice
Source: PubMed Central journal article supplement (PMC4237468; doi:10.15252/emmm.201404168), 2014-09-30
Supplement: emmm0006-1398-sd3.pdf [file emmm0006-1398-sd3.pdf]

## Contents

|                                                                                                                                                                              |    |
|------------------------------------------------------------------------------------------------------------------------------------------------------------------------------|----|
| Suppl. Table 1a .....                                                                                                                                                        | 2  |
| Antibodies used for Flow cytometry .....                                                                                                                                     | 2  |
| Suppl. Table 1b .....                                                                                                                                                        | 2  |
| Antibodies used for immunofluorescence and Western blots .....                                                                                                               | 2  |
| Suppl. Table 2 .....                                                                                                                                                         | 3  |
| Microglia and macrophages in the spinal cord in C57BL6 mice with preventive R-flurbiprofen treatment versus vehicle .....                                                    | 3  |
| Suppl. Table 3 .....                                                                                                                                                         | 3  |
| Microglia and macrophages in the spinal cord in C57BL6 mice with semi-therapeutic R-flurbiprofen .....                                                                       | 3  |
| Suppl. Table 4 .....                                                                                                                                                         | 4  |
| Spinal cord T-cells and macrophages of C57BL6 mice with EAE after receiving a $\beta$ -actin EGFP bone marrow transplant: treatment with R-flurbiprofen versus vehicle ..... | 4  |
| Suppl. Table 5 .....                                                                                                                                                         | 4  |
| Splenic T-cells of C57BL6 mice with EAE after receiving a $\beta$ -actin EGFP bone marrow transplant: treatment with R-flurbiprofen versus vehicle .....                     | 4  |
| Suppl. Table 6 .....                                                                                                                                                         | 5  |
| Splenic T-cells of C57BL6/J mice with semi-therapeutic R-flurbiprofen treatment versus vehicle .....                                                                         | 5  |
| Suppl. Table 7 .....                                                                                                                                                         | 5  |
| Splenic T-cells of SJL mice with EAE and semi-therapeutic treatment with R-flurbiprofen versus vehicle .....                                                                 | 5  |
| Suppl. Table 8 .....                                                                                                                                                         | 6  |
| Top 100 genes which were less upregulated in EAE mice on R-flurbiprofen treatment as compared to vehicle treated mice .....                                                  | 6  |
| Suppl. Table 9 .....                                                                                                                                                         | 9  |
| Gene ontology over-representation analysis for differentially regulated genes .....                                                                                          | 9  |
| Legend to Suppl. Figure 1 .....                                                                                                                                              | 10 |

## Suppl. Table 1a

### Antibodies used for Flow cytometry

| Antibody                          | Conjugate      | Company         | Concentration | Marker for                       |
|-----------------------------------|----------------|-----------------|---------------|----------------------------------|
| CD45                              | PerCPeFluor710 | BD              | 0.2 mg/ml     | Immune cells                     |
| CD45                              | VioBlue        | Miltenyi Biotec | 0.2 mg/ml     | Immune cells                     |
| CD3e                              | PacificBlue    | BD              | 0.2 mg/ml     | T-cells                          |
| CD3e                              | APC-Cy7        | Biolegend       | 0.2 mg/ml     | T-cells                          |
| CD4                               | PE             | BD              | 0.2 mg/ml     | T-helper cells                   |
| CD25                              | AlexaFluor488  | eBioscience     | 0.5 mg/ml     | Regulatory T-cells               |
| CD25                              | APC            | eBioscience     | 0.2 mg/ml     | Regulatory T-cells               |
| CD8                               | FITC           | eBioscience     | 0.5 mg/ml     | T-suppressor cells               |
| CD8                               | PerCPeFluor710 | eBioscience     | 0.2 mg/ml     | T-suppressor cells               |
| CD206                             | FITC           | Biolegend       | 0.5 mg/ml     | M2-like Macrophages              |
| CD11b                             | APC            | Miltenyi Biotec | 0.2 mg/ml     | Macrophages / microglia          |
| CD11b                             | eFluor450      | eBioscience     | 0.2 mg/ml     | Macrophages / microglia          |
| CD11c                             | eFluor450      | eBioscience     | 0.2 mg/ml     | Dendritic cells / monocytes      |
| MHCII                             | PE             | eBioscience     | 0.2 mg/ml     | Antigen presenting cells         |
| MHCII                             | PerCPeFluor710 | eBioscience     | 0.2 mg/ml     | Antigen presenting cells         |
| CD183 (CXCR3)                     | APC            | eBioscience     | 0.2 mg/ml     | Resident microglia / monocytes   |
| CD36 (Scavenger receptor class B) | PE             | eBioscience     | 0.2 mg/ml     | Monocytes/Macrophages            |
| CD152/CTLA4                       | APC            | eBioscience     | 0.2 mg/ml     | Inhibitory T-helper cells        |
| Foxp3                             | eFluor450      | eBioscience     | 0.2 mg/ml     | Regulatory T-cells               |
| IFN $\gamma$                      | AlexaFluor488  | eBioscience     | 0.5 mg/ml     | Pro-inflammatory, T-helper cells |
| IL10                              | APC            | eBioscience     | 0.2 mg/ml     | Anti-inflammatory, Th2-cells     |
| IL17A                             | PE             | eBioscience     | 0.2 mg/ml     | Pro-inflammatory, Th17-cells     |

## Suppl. Table 1b

### Antibodies used for immunofluorescence and Western blots

| Antibody     | Host   | Conjugate            | Company           | Concentration | Marker for                      |
|--------------|--------|----------------------|-------------------|---------------|---------------------------------|
| Fluoromyelin |        | Texas Red 558/654 nm | Life technologies |               | Myelin                          |
| F4/80        | rat    | Unconjugated         | eBioscience       | 0.5 mg/ml     | Myeloid cells                   |
| CD11b        | rat    | Unconjugated         | Serotec           | 1 mg/ml       | Macrophages / microglia         |
| GFAP         | rabbit | Unconjugated         | Sigma             |               | Astrocytes                      |
| Iba1         | rabbit | Unconjugated         | Santa Cruz        | 0.2 mg/ml     | Macrophages / microglia         |
| MBP          | mouse  | Unconjugated         | Covance           | 1 mg/ml       | Myelin                          |
| Arginase 1   | goat   | Unconjugated         | Santa Cruz        | 0.2 mg/ml     | M2-like macrophages / microglia |
| NF200        | rabbit | Unconjugated         | Sigma             |               | Neurofilament                   |
| NeuN         | mouse  | Unconjugated         | Millipore         | 1 mg/ml       | Neuronal nuclei                 |
| NIMP-R14     | rat    | Unconjugated         |                   |               | Neutrophils                     |

## Suppl. Table 2

### Microglia and macrophages in the spinal cord in C57BL6 mice with preventive R-flurbiprofen treatment versus vehicle

| n=3, mean ± SD        | Naive       |    | Vehicle     |    | R-Flurbi    |    | Statistics P-values |                 |
|-----------------------|-------------|----|-------------|----|-------------|----|---------------------|-----------------|
|                       | % of Parent | SD | % of Parent | SD | % of Parent | SD | Naive vs Veh        | Veh vs R-Flurbi |
| Population            |             |    |             |    |             |    |                     |                 |
| CD45+                 | 9.0 ± 1.8   |    | 13.8 ± 4.0  |    | 10.4 ± 0.3  |    | ns                  | ns              |
| CD11b-high_CD206(-)   | 1.1 ± 0.1   |    | 15.2 ± 10.1 |    | 1.5 ± 0.1   |    | 0.0093              | 0.0126          |
| CD11b-high_CD206+     | 0.3 ± 0.0   |    | 3.0 ± 2.8   |    | 0.4 ± 0.2   |    | ns                  | ns              |
| CD11b-low_CD206(-)    | 76.3 ± 2.2  |    | 53.9 ± 16.9 |    | 76.7 ± 5.8  |    | 0.0001              | 0.0001          |
| CD11b-low_MHC(-)      | 64.1 ± 2.7  |    | 50.7 ± 13.3 |    | 65.0 ± 9.0  |    | 0.0171              | 0.0079          |
| CD11b-low_MHC+        | 2.0 ± 0.7   |    | 17.8 ± 12.9 |    | 3.6 ± 1.9   |    | 0.0018              | 0.0082          |
| CD11b-low_CXCR3-low   | 71.2 ± 1.7  |    | 52.8 ± 12.9 |    | 70.0 ± 5.4  |    | 0.0002              | 0.0005          |
| CD11b-high_CXCR3-low  | 1.7 ± 0.1   |    | 16.5 ± 10.8 |    | 2.0 ± 0.1   |    | 0.005               | 0.0062          |
| CD11b.low_CXCR3-high  | 2.1 ± 1.0   |    | 2.4 ± 0.9   |    | 2.5 ± 0.7   |    | ns                  | ns              |
| CD11b.high_CXCR3-high | 0.2 ± 0.0   |    | 4.3 ± 2.2   |    | 0.7 ± 0.3   |    | ns                  | ns              |

C57BL6/J mice, myeloid cells in the spinal cord, preparation during the flare of the disease, day 20. R-flurbiprofen treatment 10 mg/kg/d in the drinking water, start 3 d after immunization (preventive).

Statistics: FACS data were analyzed by two-way ANOVA using 'population' as within and 'treatment' as between subject factors, followed by post hoc analyses using a Bonferroni correction for alpha.

## Suppl. Table 3

### Microglia and macrophages in the spinal cord in C57BL6 mice with semi-therapeutic R-flurbiprofen

| n=3 mean SD              | Naive        |    | Vehicle       |    | R-Flurbi     |    | Statistics P-values |
|--------------------------|--------------|----|---------------|----|--------------|----|---------------------|
|                          | % of Parent  | SD | % of Parent   | SD | % of Parent  | SD |                     |
| CD45                     | 4,20 ± 0,82  |    | 7,54 ± 0,88   |    | 8,06 ± 1,71  |    | ns                  |
| CD11b and/or CXCR3       | 5,23 ± 1,37  |    | 8,56 ± 3,71   |    | 7,44 ± 0,87  |    | ns                  |
| CD11b                    | 5,40 ± 0,54  |    | 13,00 ± 1,30  |    | 7,30 ± 0,73  |    | ns                  |
| CD11b_MHC-II(-) CXCR3+   | 53,50 ± 6,30 |    | 53,00 ± 5,30  |    | 59,00 ± 4,90 |    | ns                  |
| CD11b_MHC-II+ CXCR3+     | 4,75 ± 0,47  |    | 15,00 ± 1,52  |    | 3,00 ± 0,30  |    | 0.0013              |
| CD11b_MHC-II+ CXCR3(-)   | 0,60 ± 0,06  |    | 1,70 ± 0,14   |    | 1,40 ± 0,17  |    | ns                  |
| CD11b_MHC-II(-) CXCR3(-) | 42,00 ± 3,20 |    | 30,00 ± 3,20  |    | 37,00 ± 3,70 |    | ns                  |
| CD11b_CD36(-) CD206+     | 3,80 ± 0,37  |    | 5,90 ± 1,59   |    | 3,10 ± 1,31  |    | ns                  |
| CD11b_CD36+ CD206+       | 13,00 ± 3,30 |    | 0,70 ± 0,17   |    | 4,10 ± 0,41  |    | ns                  |
| CD11b_CD36+ CD206(-)     | 56,00 ± 4,60 |    | 0,10 ± 0,01   |    | 65,00 ± 6,50 |    | 0.000007            |
| CD11b_CD36(-) CD206(-)   | 28,00 ± 2,83 |    | 93,00 ± 15,30 |    | 28,00 ± 3,80 |    | 0.000013            |

C57BL6/J mice, myeloid cells in the spinal cord, preparation during the flare of the disease, day 20. R-flurbiprofen treatment 10 mg/kg/d in drinking water, 4 days before onset of clinical scores (semi-therapeutic).

Statistics: FACS data were analyzed by two-way ANOVA using 'population' as within and 'treatment' as between subject factors, followed by post hoc analyses using a Bonferroni correction for alpha.

## Suppl. Table 4

Spinal cord T-cells and macrophages of C57BL6 mice with EAE after receiving a  $\beta$ -actin EGFP bone marrow transplant: treatment with R-flurbiprofen versus vehicle

| n=4, mean $\pm$ SD<br>Population | Naive             | Vehicle             | R-Flurbi           | Statistics P-values |                 |
|----------------------------------|-------------------|---------------------|--------------------|---------------------|-----------------|
|                                  | Counts            | Counts              | Counts             | N vs Veh            | Veh vs R-Flurbi |
| $\beta$ -actin-low.CD4+          | 252.5 $\pm$ 37.5  | 749.5 $\pm$ 172.6   | 471.3 $\pm$ 180.7  | 0.0337              | ns              |
| $\beta$ -actin-high.CD4+         | 17.0 $\pm$ 1.2    | 538.0 $\pm$ 86.1    | 301.0 $\pm$ 253.5  | 0.0262              | ns              |
| $\beta$ -actin-low.CD11b+        | 499.5 $\pm$ 131.1 | 2150.0 $\pm$ 462.2  | 1186.3 $\pm$ 591.4 | 0.0001              | 0.0019          |
| $\beta$ -actin-high.CD11b+       | 88.5 $\pm$ 15.6   | 387.5 $\pm$ 58.9    | 252.8 $\pm$ 122.0  | ns                  | ns              |
| $\beta$ -actin+CD25+             | 1702.5 $\pm$ 47.9 | 2675.8 $\pm$ 1196.4 | 1914.8 $\pm$ 369.8 | 0.0016              | 0.0379          |
| CD11b-low.CD25+                  | 431.0 $\pm$ 50.8  | 841.5 $\pm$ 113.1   | 704.8 $\pm$ 160.0  | ns                  | ns              |
| CD11-high.CD25+                  | 17.5 $\pm$ 5.2    | 806.8 $\pm$ 342.4   | 528.5 $\pm$ 391.6  | 0.0256              | ns              |
| CD4+CD25low                      | 100.0 $\pm$ 12.7  | 820.3 $\pm$ 345.9   | 519.0 $\pm$ 344.2  | 0.052               | ns              |
| CD4+CD25high                     | 16.5 $\pm$ 0.6    | 85.0 $\pm$ 35.2     | 54.0 $\pm$ 34.5    | ns                  | ns              |

C57BL6/J mice after bone marrow transplantation from  $\beta$ -actin-EGFP donor mice. Immunization 3 weeks after irradiation. R-flurbiprofen 10 mg/kg/d in the drinking water from day 3 after immunization. Preparation of spinal cords during the flare of the disease, day 16.

Statistics: FACS data were analyzed by two-way ANOVA using 'population' as within and 'treatment' as between subject factors, followed by post hoc analyses using a Bonferroni correction for alpha.

## Suppl. Table 5

Splenic T-cells of C57BL6 mice with EAE after receiving a  $\beta$ -actin EGFP bone marrow transplant: treatment with R-flurbiprofen versus vehicle

| n=4, mean $\pm$ SD<br>Population     | Vehicle     |           | R-flurbiprofen |            | Statistics P-values |
|--------------------------------------|-------------|-----------|----------------|------------|---------------------|
|                                      | % of Parent | SD        | % of Parent    | SD         |                     |
| $\beta$ -actin(-)                    | 39.3        | $\pm$ 2.5 | 52.7           | $\pm$ 6.3  | 0.0151              |
| $\beta$ -actin(-)CD4+                | 11.4        | $\pm$ 1.7 | 6.4            | $\pm$ 1.3  | ns                  |
| $\beta$ -actin(-)_CD4+_CD25(-)FoxP3+ | 6.1         | $\pm$ 1.9 | 18.2           | $\pm$ 3.5  | 0.0320              |
| $\beta$ -actin(-)_CD4+_CD25+FoxP3+   | 3.5         | $\pm$ 0.9 | 14.7           | $\pm$ 4.6  | 0.0495              |
| $\beta$ -actin+                      | 37.7        | $\pm$ 3.1 | 29.3           | $\pm$ 6.5  | ns                  |
| $\beta$ -actin+CD4+                  | 44.7        | $\pm$ 3.4 | 59.4           | $\pm$ 4.8  | 0.0066              |
| $\beta$ -actin+CD4+_CD25(-)FoxP3+    | 12.6        | $\pm$ 6.6 | 30.1           | $\pm$ 4.1  | 0.0008              |
| $\beta$ -actin+CD4+_CD25+FoxP3+      | 6.5         | $\pm$ 3.4 | 36.9           | $\pm$ 18.4 | 0.0001              |
| $\beta$ -actin+_CD4+CD25+            | 2.3         | $\pm$ 0.6 | 12.9           | $\pm$ 9.3  | ns                  |
| CD4+                                 | 25.5        | $\pm$ 1.9 | 19.8           | $\pm$ 5.3  | ns                  |
| CD4+_CD25+FoxP3+                     | 0.1         | $\pm$ 0.1 | 7.0            | $\pm$ 7.1  | ns                  |

C57BL6/J mice after bone marrow transplantation from  $\beta$ -actin-EGFP donor mice. Immunization 3 weeks after irradiation. R-flurbiprofen 10 mg/kg/d in the drinking water from day 3 after immunization. Preparation of splenocytes during the flare of the disease, day 16.

Statistics: FACS data were analyzed by two-way ANOVA using 'population' as within and 'treatment' as between subject factors, followed by post hoc analyses using a Bonferroni correction for alpha.

## Suppl. Table 6

### Splenic T-cells of C57BL6/J mice with-semi therapeutic R-flurbiprofen treatment versus vehicle

| n=3, mean ± SD<br>Population | Naive       |    | Vehicle    |    | R-flurbiprofen |    | Statistics<br>Veh vs. R-Flurbi |
|------------------------------|-------------|----|------------|----|----------------|----|--------------------------------|
|                              | % Parent    | SD | % Parent   | SD | % Parent       | SD |                                |
| CD4+                         | 24.9 ± 4.3  |    | 42.2 ± 5.4 |    | 43.7 ± 6.9     |    | ns                             |
| CD4+FoxP3+                   | 5.9 ± 1.7   |    | 5.04 ± 0.7 |    | 5.06 ± 1.4     |    | ns                             |
| CD4+FoxP3+IL10+              | 11.7 ± 2.1  |    | 14.7 ± 2.2 |    | 47.1 ± 8.2     |    | 0.0001                         |
| CD4+IL10+                    | 1.0 ± 0.2   |    | 0.84 ± 0.3 |    | 2.55 ± 0.4     |    | 0.04                           |
| IL-10+                       | 9.0 ± 1.6   |    | 4.98 ± 1.0 |    | 6.18 ± 1.5     |    | ns                             |
| FoxP3(-)IL10+                | 3.8 ± 0.2   |    | 5.75 ± 1.2 |    | 1.67 ± 1.1     |    | ns                             |
| FoxP3+IL10+                  | 10.2 ± 1.8  |    | 5.69 ± 1.0 |    | 16.3 ± 1.8     |    | 0.004                          |
| FoxP3+IL10(-)                | 17.1 ± 2.4  |    | 11.5 ± 2.0 |    | 9.76 ± 1.7     |    | ns                             |
| FoxP3(-)IL10(-)              | 69.0 ± 12.0 |    | 77.1 ± 5.1 |    | 72.2 ± 4.6     |    | ns                             |

C57BL6/J mice during the flare, R-flurbiprofen 10 mg/kg/d in the drinking water, start of treatment 4 days before onset of scores (semi-therapeutic). Splenocytes were restimulated with 50 ng/ml PMA + 500 ng/ml ionomycin for 2h, 37°C. Cytokine release block with brefeldin A 10 µg/ml for 2h, 37°C.

Statistics: FACS data were analyzed by two-way ANOVA using 'population' as within and 'treatment' as between subject factors, followed by post hoc analyses using a Bonferroni correction for alpha.

## Suppl. Table 7

### Splenic T-cells of SJL mice with EAE and semi-therapeutic treatment with R-flurbiprofen versus vehicle

| n = 10, mean ± SD<br>Population | Vehicle       |    | R-flurbiprofen |    | Statistics |
|---------------------------------|---------------|----|----------------|----|------------|
|                                 | % of Parent   | SD | % of Parent    | SD |            |
| CD3+                            | 31.01 ± 3.99  |    | 21.37 ± 5.39   |    | 0.0015     |
| CD3+CD8+                        | 27.53 ± 3.35  |    | 21.78 ± 1.30   |    | ns         |
| CD3+CD8+CD152+                  | 18.28 ± 11.99 |    | 32.99 ± 9.80   |    | 0.0003     |
| CD3+CD8+CD152(-)                | 74.36 ± 12.66 |    | 57.77 ± 9.39   |    | 0.0040     |
| CD3+CD4+                        | 62.65 ± 2.66  |    | 66.99 ± 1.73   |    | ns         |
| CD3+CD4+CD152+                  | 7.77 ± 7.86   |    | 17.44 ± 7.94   |    | 0.0033     |
| CD3+CD4+CD152(-)                | 87.97 ± 8.45  |    | 77.77 ± 7.59   |    | 0.0032     |
| CD8+                            | 9.59 ± 1.96   |    | 5.45 ± 1.25    |    | 0.0104     |
| CD8+CD25+                       | 2.25 ± 0.79   |    | 3.63 ± 1.44    |    | 0.0013     |
| CD4+                            | 21.91 ± 2.58  |    | 16.99 ± 3.98   |    | 0.0281     |
| CD4+CD25+                       | 2.546 ± 0.68  |    | 3.55 ± 0.63    |    | 0.0267     |
| CD4+CD152+                      | 10.712 ± 8.40 |    | 20.30 ± 8.05   |    | 0.0073     |
| CD4+CD152+CD25+                 | 0.781 ± 0.60  |    | 1.14 ± 0.39    |    | ns         |

FACS analysis of T-cells in the spleen of SJL mice during the 1st EAE flare. R-flurbiprofen 5 mg/kg/d in the drinking water, start 5d after immunization (semi-therapeutic). CD152 = CTLA4 (Cytotoxic T-Lymphocyte Antigen 4) is a marker for T-cells that down-regulate an activated immune system.

Statistics: FACS data were analyzed by two-way ANOVA using 'population' as within and 'treatment' as between subject factors, followed by post hoc analyses using a Bonferroni correction for alpha.

## Suppl. Table 8

### Top 100 genes which were less upregulated in EAE mice on R-flurbiprofen treatment as compared to vehicle treated mice

| Accession      | Symbol          | Gene expression mean intensity (AU) |              |             |              | Protein product | Definition                                                                                                                  |
|----------------|-----------------|-------------------------------------|--------------|-------------|--------------|-----------------|-----------------------------------------------------------------------------------------------------------------------------|
|                |                 | CFA-Vehicle                         | CFA-R-Flurbi | EAE-Vehicle | EAE-R-Flurbi |                 |                                                                                                                             |
| NM_178185.1    | Hist1h2ao       | 2743.47                             | 2249.86      | 9214.45     | 3846.86      | NM_178185.1     | Mus musculus histone cluster 1, H2ao (Hist1h2ao), mRNA.                                                                     |
| NM_016740.3    | S100a11         | 2702.15                             | 2146.56      | 15077.89    | 6192.28      | NP_058020.1     | Mus musculus S100 calcium binding protein A11 (calgizzarin) (S100a11), mRNA.                                                |
| NM_007542.3    | Bgn             | 2509.33                             | 2340.65      | 6863.45     | 2862.38      | NP_031568.2     | Mus musculus biglycan (Bgn), mRNA.                                                                                          |
| NM_017372.3    | Lyz2            | 1826.68                             | 998.44       | 17082.36    | 6087.44      | NP_059068.1     | Mus musculus lysozyme 2 (Lyz2), mRNA.                                                                                       |
| NM_008175.3    | Grn             | 1462.04                             | 1347.53      | 11592.11    | 4133.82      | NP_032201.1     | Mus musculus granulin (Grn), mRNA.                                                                                          |
| NM_009663.1    | Alox5ap         | 1354.91                             | 772.07       | 8300.58     | 3184.84      | NP_033793.1     | Mus musculus arachidonate 5-lipoxygenase activating protein (Alox5ap), mRNA.                                                |
| NM_007792.3    | Csrp2           | 1202.46                             | 1336.73      | 2453.16     | 1029.27      | NM_007792.3     | Mus musculus cysteine and glycine-rich protein 2 (Csrp2), mRNA.                                                             |
| NM_010517.3    | Igfbp4          | 1119.60                             | 1067.15      | 3339.25     | 1239.43      | NP_034647.1     | Mus musculus insulin-like growth factor binding protein 4 (Igfbp4), mRNA.                                                   |
| NM_010705.2    | Lgals3          | 1091.12                             | 764.05       | 15570.30    | 6174.99      | NP_034835.1     | Mus musculus lectin, galactose binding, soluble 3 (Lgals3), mRNA.                                                           |
| NM_008183.3    | Gstm2           | 1004.19                             | 1181.14      | 2222.57     | 904.10       | NP_032209.1     | Mus musculus glutathione S-transferase, mu 2 (Gstm2), mRNA.                                                                 |
| NM_001034097.1 | Tnfsf12-tnfsf13 | 902.41                              | 1073.75      | 2954.69     | 1124.02      | NP_001029269.1  | Mus musculus tumor necrosis factor (ligand) superfamily, member 12-member 13 (Tnfsf12-tnfsf13), transcript variant 1, mRNA. |
| NM_008908.1    | Ppic            | 855.36                              | 980.36       | 3327.58     | 1312.79      | NP_032934.1     | Mus musculus peptidylprolyl isomerase C (Ppic), mRNA.                                                                       |
| NM_008161.2    | Gpx3            | 838.87                              | 713.48       | 4045.89     | 1246.00      | NP_032187.2     | Mus musculus glutathione peroxidase 3 (Gpx3), transcript variant 2, mRNA.                                                   |
| NM_008039.2    | Fpr2            | 819.55                              | 406.84       | 6675.74     | 2594.26      | NP_032065.1     | Mus musculus formyl peptide receptor 2 (Fpr2), mRNA.                                                                        |
| NM_007426.3    | Angpt2          | 808.02                              | 855.42       | 1873.18     | 746.43       | NP_031452.2     | Mus musculus angiopoietin 2 (Angpt2), mRNA.                                                                                 |
| NM_017372.2    | Lyzs            | 737.21                              | 510.56       | 6403.37     | 2554.39      | NP_059068.1     | Mus musculus lysozyme (Lyzs), mRNA.                                                                                         |
| NM_133198.1    | Pygl            | 728.19                              | 523.36       | 2834.96     | 1141.12      | NP_573461.1     | Mus musculus liver glycogen phosphorylase (Pygl), mRNA.                                                                     |
| NM_013739.2    | Dok3            | 697.05                              | 728.38       | 2364.50     | 989.56       | NM_013739.2     | Mus musculus docking protein 3 (Dok3), mRNA.                                                                                |
| NM_026436.3    | Tmem86a         | 654.39                              | 686.67       | 2055.27     | 832.37       | NP_080712.1     | Mus musculus transmembrane protein 86A (Tmem86a), mRNA.                                                                     |
| NM_015734.1    | Col5a1          | 640.57                              | 831.39       | 2120.37     | 688.95       | NP_056549.1     | Mus musculus procollagen, type V, alpha 1 (Col5a1), mRNA.                                                                   |
| NM_011414.2    | Slpi            | 622.87                              | 347.18       | 2128.69     | 588.62       | NP_035544.1     | Mus musculus secretory leukocyte peptidase inhibitor (Slpi), mRNA.                                                          |
| NM_145126.1    | Chi3l4          | 606.66                              | 375.22       | 8332.35     | 1552.28      | NP_660108.1     | Mus musculus chitinase 3-like 4 (Chi3l4), mRNA.                                                                             |
| NM_010740.3    | Cd93            | 604.54                              | 487.38       | 2093.96     | 649.20       | NP_034870.1     | Mus musculus CD93 antigen (Cd93), mRNA.                                                                                     |
| NM_026376.3    | Plxnd1          | 573.89                              | 583.24       | 2172.55     | 759.08       | NP_080652.2     | Mus musculus plexin D1 (Plxnd1), mRNA.                                                                                      |
| NM_010728.1    | Lox             | 562.84                              | 636.16       | 2240.46     | 793.56       | NP_034858.1     | Mus musculus lysyl oxidase (Lox), mRNA.                                                                                     |
| NM_007681.2    | Cenpa           | 559.14                              | 511.07       | 2855.60     | 1064.95      | NP_031707.1     | Mus musculus centromere protein A (Cenpa), mRNA.                                                                            |
| NM_175659.1    | Hist1h2ah       | 539.95                              | 470.67       | 2437.46     | 993.62       | NP_783590.1     | Mus musculus histone cluster 1, H2ah (Hist1h2ah), mRNA.                                                                     |
| NM_011990.2    | Slc7a11         | 521.67                              | 439.93       | 2050.53     | 714.44       | NP_036120.1     | Mus musculus solute carrier family 7 (cationic amino acid transporter, y+ system), member 11 (Slc7a11), mRNA.               |
| NM_010729.2    | Loxl1           | 488.54                              | 444.13       | 2002.56     | 749.22       | NP_034859.2     | Mus musculus lysyl oxidase-like 1 (Loxl1), mRNA.                                                                            |
| NM_028784.2    | F13a1           | 487.60                              | 334.74       | 2001.46     | 440.80       | NP_083060.2     | Mus musculus coagulation factor XIII, A1 subunit (F13a1), mRNA.                                                             |
| NM_009841.3    | Cd14            | 477.04                              | 247.93       | 4806.94     | 1375.82      | NP_033971.1     | Mus musculus CD14 antigen (Cd14), mRNA.                                                                                     |
| NM_009349.3    | Inmt            | 464.70                              | 461.40       | 1991.23     | 220.69       | NP_033375.1     | Mus musculus indolethylamine N-methyltransferase (Inmt), mRNA.                                                              |
| NM_007392.2    | Acta2           | 460.04                              | 423.57       | 1197.17     | 422.44       | NP_031418.1     | Mus musculus actin, alpha 2, smooth muscle, aorta (Acta2), mRNA.                                                            |
| NM_009369.3    | Tgfb1           | 459.64                              | 410.74       | 5372.81     | 1977.08      | NP_033395.1     | Mus musculus transforming growth factor, beta induced (Tgfb1), mRNA.                                                        |
| NM_011662.2    | Tyrobp          | 459.22                              | 341.45       | 3447.84     | 1467.13      | NP_035792.1     | Mus musculus TYRO protein tyrosine kinase binding protein (Tyrobp), mRNA.                                                   |
| NM_001008702.1 | Dab2            | 443.56                              | 427.31       | 3347.97     | 1011.92      | NP_001008702.1  | Mus musculus disabled homolog 2 (Drosophila) (Dab2), transcript variant 2, mRNA.                                            |
| NM_031397.2    | Bicc1           | 422.42                              | 447.19       | 1097.06     | 421.26       | NP_113574.1     | Mus musculus bicaudal C homolog 1 (Drosophila) (Bicc1), mRNA.                                                               |
| NM_007899.1    | Ecm1            | 394.19                              | 393.80       | 3664.06     | 749.21       | NP_031925.1     | Mus musculus extracellular matrix protein 1 (Ecm1), mRNA.                                                                   |
| NM_008342.2    | Igfbp2          | 388.20                              | 390.06       | 925.55      | 333.19       | NP_032368.2     | Mus musculus insulin-like growth factor binding protein 2 (Igfbp2), mRNA.                                                   |

|                |          |        |        |         |         |                |                                                                                                             |
|----------------|----------|--------|--------|---------|---------|----------------|-------------------------------------------------------------------------------------------------------------|
| XM_001480162.1 | Fer1l3   | 380.44 | 323.48 | 2296.83 | 899.62  | XP_001480212.1 | PREDICTED: Mus musculus fer-1-like 3, myoferlin ( <i>C. elegans</i> ), transcript variant 1 (Fer1l3), mRNA. |
| NM_028903.1    | Scara5   | 366.80 | 476.22 | 1109.87 | 393.50  | NP_083179.1    | Mus musculus scavenger receptor class A, member 5 (putative) (Scara5), mRNA.                                |
| NM_053110.3    | Gpnmb    | 364.32 | 434.53 | 8533.03 | 811.09  | NP_444340.2    | Mus musculus glycoprotein (transmembrane) nmb (Gpnmb), mRNA.                                                |
| NM_008549.1    | Man2a1   | 358.61 | 365.15 | 1935.25 | 817.96  | NP_032575.1    | Mus musculus mannosidase 2, alpha 1 (Man2a1), mRNA.                                                         |
| NM_011347.1    | Selp     | 344.60 | 169.07 | 2400.38 | 907.53  | NP_035477.1    | Mus musculus selectin, platelet (Selp), mRNA.                                                               |
| NM_175097.3    | Prickle3 | 338.73 | 357.67 | 1114.61 | 478.80  | NP_780306.1    | Mus musculus prickle homolog 3 ( <i>Drosophila</i> ) (Prickle3), mRNA.                                      |
| NM_010233.1    | Fn1      | 331.58 | 289.52 | 3079.86 | 891.89  | NP_034363.1    | Mus musculus fibronectin 1 (Fn1), mRNA.                                                                     |
| NM_201641.2    | Ugt1a10  | 322.79 | 346.78 | 1590.00 | 618.45  | NP_964003.2    | Mus musculus UDP glycosyltransferase 1 family, polypeptide A10 (Ugt1a10), mRNA.                             |
| NM_031254.2    | Trem2    | 322.71 | 318.50 | 1842.32 | 586.81  | NP_112544.1    | Mus musculus triggering receptor expressed on myeloid cells 2 (Trem2), mRNA.                                |
| NM_023132.2    | Renbp    | 318.20 | 357.56 | 1402.64 | 546.87  | NP_075621.2    | Mus musculus renin binding protein (Renbp), mRNA.                                                           |
| NM_145150.1    | Prc1     | 316.08 | 293.18 | 1825.85 | 702.08  | NP_660132.1    | Mus musculus protein regulator of cytokinesis 1 (Prc1), mRNA.                                               |
| NM_008380.1    | Inhba    | 307.19 | 271.81 | 1426.82 | 613.32  | NP_032406.1    | Mus musculus inhibin beta-A (Inhba), mRNA.                                                                  |
| NM_007925.3    | Eln      | 303.79 | 274.66 | 914.59  | 364.82  | NP_031951.2    | Mus musculus elastin (Eln), mRNA.                                                                           |
| NM_001081437.1 | Fbln2    | 286.44 | 318.64 | 2024.86 | 449.03  | NP_001074906.1 | Mus musculus fibulin 2 (Fbln2), transcript variant 2, mRNA.                                                 |
| NM_173371.3    | H6pd     | 285.62 | 290.61 | 1299.77 | 551.44  | NP_775547.2    | Mus musculus hexose-6-phosphate dehydrogenase (glucose 1-dehydrogenase) (H6pd), mRNA.                       |
| NM_011338.2    | Ccl9     | 285.18 | 241.24 | 6958.17 | 2115.19 | NP_035468.1    | Mus musculus chemokine (C-C motif) ligand 9 (Ccl9), mRNA.                                                   |
| NM_009994.1    | Cyp1b1   | 282.51 | 289.23 | 1475.65 | 610.05  | NP_034124.1    | Mus musculus cytochrome P450, family 1, subfamily b, polypeptide 1 (Cyp1b1), mRNA.                          |
| NM_009994.1    | Cyp1b1   | 282.51 | 289.23 | 1475.65 | 610.05  | NP_034124.1    | Mus musculus cytochrome P450, family 1, subfamily b, polypeptide 1 (Cyp1b1), mRNA.                          |
| NM_173442.2    | Gcnt1    | 277.71 | 252.02 | 800.56  | 329.16  | NP_775618.1    | Mus musculus glucosaminyl (N-acetyl) transferase 1, core 2 (Gcnt1), mRNA.                                   |
| NM_009853.1    | Cd68     | 270.51 | 242.26 | 3534.51 | 1019.87 | NP_033983.1    | Mus musculus CD68 antigen (Cd68), mRNA.                                                                     |
| NM_007782.1    | Csf3r    | 261.12 | 227.70 | 1216.46 | 466.28  | NP_031808.1    | Mus musculus colony stimulating factor 3 receptor (granulocyte) (Csf3r), mRNA.                              |
| NM_008489.2    | Lbp      | 254.43 | 245.47 | 945.85  | 320.85  | NP_032515.2    | Mus musculus lipopolysaccharide binding protein (Lbp), mRNA.                                                |
| NM_009892.1    | Chi3l3   | 244.62 | 168.68 | 2372.97 | 343.58  | NP_034022.1    | Mus musculus chitinase 3-like 3 (Chi3l3), mRNA.                                                             |
| NM_007472.2    | Aqp1     | 243.31 | 281.51 | 1842.63 | 485.22  | NP_031498.1    | Mus musculus aquaporin 1 (Aqp1), mRNA.                                                                      |
| NM_020568.2    | S3-12    | 241.41 | 256.76 | 735.05  | 271.70  | NP_065593.1    | Mus musculus plasma membrane associated protein, S3-12 (S3-12), mRNA.                                       |
| NM_007408.3    | Adfp     | 234.24 | 239.10 | 1099.28 | 380.58  | NP_031434.3    | Mus musculus adipose differentiation related protein (Adfp), mRNA.                                          |
| NM_007739.2    | Col8a1   | 223.58 | 219.49 | 946.27  | 360.09  | NP_031765.2    | Mus musculus collagen, type VIII, alpha 1 (Col8a1), mRNA.                                                   |
| NM_133754.3    | Fblim1   | 221.20 | 202.79 | 1146.81 | 415.22  | NP_598515.3    | Mus musculus filamin binding LIM protein 1 (Fblim1), mRNA.                                                  |
| NM_026414.2    | Asprv1   | 213.57 | 161.43 | 1076.27 | 244.48  | NP_080690.2    | Mus musculus aspartic peptidase, retroviral-like 1 (Asprv1), mRNA.                                          |
| NM_138672.2    | Stab1    | 209.38 | 221.48 | 832.33  | 309.40  | NP_619613.2    | Mus musculus stabilin 1 (Stab1), mRNA.                                                                      |
| NM_009909.3    | Il8rb    | 205.90 | 153.30 | 533.43  | 220.27  | NP_034039.1    | Mus musculus interleukin 8 receptor, beta (Il8rb), mRNA.                                                    |
| NM_010819.3    | Clec4d   | 197.09 | 165.69 | 3459.59 | 640.31  | NP_034949.2    | Mus musculus C-type lectin domain family 4, member d (Clec4d), mRNA.                                        |
| NM_205820.1    | Tlr13    | 196.49 | 169.62 | 1097.99 | 422.13  | NP_991389.1    | Mus musculus toll-like receptor 13 (Tlr13), mRNA.                                                           |
| NM_010924.1    | Nnmt     | 194.36 | 186.49 | 834.97  | 350.37  | NP_035054.1    | Mus musculus nicotinamide N-methyltransferase (Nnmt), mRNA.                                                 |
| NM_177337.3    | Arl11    | 192.73 | 180.51 | 1522.75 | 510.94  | NP_796311.2    | Mus musculus ADP-ribosylation factor-like 11 (Arl11), mRNA.                                                 |
| NM_009695.2    | Apoc2    | 192.71 | 179.84 | 1392.32 | 319.98  | NP_033825.1    | Mus musculus apolipoprotein C-II (Apoc2), mRNA.                                                             |
| NM_018827.2    | Crif1    | 189.75 | 197.72 | 1156.90 | 318.97  | NP_061297.1    | Mus musculus cytokine receptor-like factor 1 (Crif1), mRNA.                                                 |
| NM_013489.1    | Cd84     | 187.85 | 185.31 | 1493.00 | 563.05  | NP_038517.1    | Mus musculus CD84 antigen (Cd84), mRNA.                                                                     |
| NM_023125.2    | Kng1     | 186.51 | 186.23 | 1368.65 | 291.24  | NP_075614.1    | Mus musculus kininogen 1 (Kng1), mRNA.                                                                      |
| NM_021293.2    | Cd33     | 176.86 | 163.78 | 1068.33 | 354.08  | NP_067268.1    | Mus musculus CD33 antigen (Cd33), mRNA.                                                                     |
| NM_027836.5    | Ms4a7    | 175.52 | 174.41 | 1149.98 | 361.79  | NP_082112.3    | Mus musculus membrane-spanning 4-domains, subfamily A, member 7 (Ms4a7), transcript variant 1, mRNA.        |
| NM_010555.4    | Il1r2    | 175.31 | 153.61 | 1181.74 | 346.23  | NP_034685.1    | Mus musculus interleukin 1 receptor, type II (Il1r2), mRNA.                                                 |
| NM_011113.3    | Plaur    | 169.48 | 174.92 | 864.11  | 348.24  | NP_035243.1    | Mus musculus plasminogen activator, urokinase receptor (Plaur), mRNA.                                       |
| NM_001077189.1 | Fcgr2b   | 165.97 | 141.68 | 1652.81 | 642.12  | NP_001070657.1 | Mus musculus Fc receptor, IgG, low affinity IIb (Fcgr2b), transcript variant 1, mRNA.                       |
| NM_026835.2    | Ms4a6d   | 155.70 | 146.26 | 1995.78 | 855.31  | NP_081111.1    | Mus musculus membrane-spanning 4-domains, subfamily A, member 6D (Ms4a6d), mRNA.                            |
| NM_031167.3    | Il1rn    | 155.57 | 151.40 | 2091.58 | 765.83  | NP_112444.1    | Mus musculus interleukin 1 receptor antagonist (Il1rn), transcript variant 1, mRNA.                         |
| NM_001042489.1 | Hvcn1    | 151.74 | 163.25 | 773.52  | 324.98  | NP_001035954.1 | Mus musculus hydrogen voltage-gated channel 1 (Hvcn1), transcript variant 1, mRNA.                          |
| NM_008372.3    | Il7r     | 148.13 | 161.79 | 1120.28 | 350.88  | NP_032398.3    | Mus musculus interleukin 7 receptor (Il7r), mRNA.                                                           |
| NM_145634.2    | Cd300lf  | 147.92 | 133.72 | 660.70  | 284.41  | NP_663609.2    | Mus musculus CD300 antigen like family member F (Cd300lf), mRNA.                                            |

|             |         |        |        |          |         |             |                                                                                  |
|-------------|---------|--------|--------|----------|---------|-------------|----------------------------------------------------------------------------------|
| NM_019984.2 | Tgm1    | 147.50 | 151.32 | 2867.45  | 956.28  | NP_064368.2 | Mus musculus transglutaminase 1, K polypeptide (Tgm1), mRNA.                     |
| NM_010172.2 | F7      | 147.03 | 142.33 | 620.18   | 175.40  | NP_034302.1 | Mus musculus coagulation factor VII (F7), mRNA.                                  |
| NM_176913   | Dpep2   | 147.00 | 137.37 | 776.15   | 229.23  | NP_795887.2 | Mus musculus dipeptidase 2 (Dpep2), mRNA.                                        |
| NM_007482   | Arg1    | 141.87 | 164.49 | 11710.46 | 2856.73 | NP_031508.1 | Mus musculus arginase 1, liver (Arg1), mRNA.                                     |
| NM_016669.1 | Crym    | 139.10 | 146.47 | 503.50   | 193.16  | NP_057878.1 | Mus musculus crystallin, mu (Crym), mRNA.                                        |
| NM_008134.2 | Glycam1 | 138.08 | 141.95 | 682.03   | 219.17  | NP_032160.1 | Mus musculus glycosylation dependent cell adhesion molecule 1 (Glycam1), mRNA.   |
| NM_022430.2 | Ms4a8a  | 137.73 | 131.16 | 974.42   | 307.28  | NP_071875.2 | Mus musculus membrane-spanning 4-domains, subfamily A, member 8A (Ms4a8a), mRNA. |
| NM_008605.3 | Mmp12   | 136.00 | 135.44 | 607.44   | 217.01  | NP_032631.3 | Mus musculus matrix metalloproteinase 12 (Mmp12), mRNA.                          |
| NM_009705.1 | Arg2    | 133.31 | 135.41 | 513.41   | 206.02  | NP_033835.1 | Mus musculus arginase type II (Arg2), mRNA.                                      |
| NM_030701.1 | Gpr109a | 130.67 | 125.44 | 1761.86  | 748.84  | NP_109626.1 | Mus musculus G protein-coupled receptor 109A (Gpr109a), mRNA.                    |



## Suppl. Table 9

### Gene ontology over-representation analysis for differentially regulated genes

| Functional area (GO Category)                                                                | GoTerm ID  | Remarkability [%] |
|----------------------------------------------------------------------------------------------|------------|-------------------|
| <b>Over-represented</b>                                                                      |            |                   |
| <b>response to stimulus</b>                                                                  | GO:0050896 | 82                |
| response to stress                                                                           | GO:0006950 | 64                |
| response to wounding                                                                         | GO:0009611 | 35                |
| regulation of response to stimulus                                                           | GO:0048583 | 23                |
| inflammatory response                                                                        | GO:0006954 | 15                |
| response to organic substance                                                                | GO:0010033 | 11                |
| <b>immune system process</b>                                                                 | GO:0002376 | 50                |
| immune response                                                                              | GO:0006955 | 27                |
| inflammatory response                                                                        | GO:0006954 | 15                |
| leukocyte activation                                                                         | GO:0045321 | 2                 |
| <b>multicellular organismal development</b>                                                  | GO:0007275 | 50                |
| multicellular organismal process                                                             | GO:0032501 | 50                |
| blood vessel development                                                                     | GO:0001568 | 5                 |
| <b>biological regulation</b>                                                                 | GO:0065007 | 46                |
| <div style="text-align: center;"><b>diverse Regulations</b></div>                            |            |                   |
| <b>signaling pathway</b>                                                                     | GO:0023033 | 33                |
| <div style="text-align: center;"><b>signal transduction</b></div>                            | GO:0007165 | 25                |
| <div style="text-align: center;"><b>cell surface receptor linked signaling pathway</b></div> | GO:0007166 | 0                 |
| <b>biological adhesion</b>                                                                   | GO:0022610 | 22                |
| <div style="text-align: center;"><b>cell adhesion</b></div>                                  | GO:0007155 | 22                |
| <b>cell proliferation</b>                                                                    | GO:0008283 | 13                |
| <b>Under-represented</b>                                                                     |            |                   |
| <b>cellular metabolic process</b>                                                            | GO:0044237 | 38                |
| <div style="text-align: center;"><b>gene expression</b></div>                                | GO:0010467 | 14                |
| <div style="text-align: center;"><b>nucleic acid metabolic process</b></div>                 | GO:0090304 | 13                |
| <div style="text-align: center;"><b>cellular macromolecule biosynthetic process</b></div>    | GO:0034645 | 10                |

The table shows the ORA (parameters: p-value threshold.  $t_p = 0.05$  and Bonferroni  $\alpha$  correction) for genes, which were less upregulated in EAE mice treated with R-flurbiprofen as compared to vehicle treated mice. The functional areas i.e. the “headlines” describing the functions of the set of genes in a comprehensive manner (1) are shown in bold letters aligned left. Further significant GO terms located in the knowledge representation graph (see Suppl. Figure 1) down along the hierarchy are inserted below the respective functional areas. Significant GO terms are a result of over-representation analysis (ORA) of the genes that were less upregulated in EAE mice treated with R-flurbiprofen as compared to vehicle treated mice. The precise definition of the GO terms can be obtained using the AmiGO search tool for GO at <http://amigo.geneontology.org/>. Remarkableness of a term is the product of (i) the certainty that the term describes the gene set and (ii) the information of the particular term as describing a subset of genes (1).

1. Lotsch, J., Schaeffeler, E., Mittelbronn, M., Winter, S., Gudziol, V., Schwarzacher, S.W., Hummel, T., Doehring, A., Schwab, M., and Ultsch, A. 2013. Functional genomics suggest neurogenesis in the adult human olfactory bulb. *Brain Struct Funct.*

### Legend to Suppl. Figure 1

Graphical representation of the gene ontology (GO) classification showing the polyhierarchy of functional annotations (GO terms) assigned to those genes that were less upregulated in EAE mice treated with R-flurbiprofen as compared to vehicle treated mice.
